# Supplementary material
Source: PubMed Central journal article supplement (PMC9364420)
Supplement: NIHMS1822256-supplement-Supplementary_Data.pdf [file NIHMS1822256-supplement-Supplementary_Data.pdf]

**Table 1:** Metabolomics pathway analysis showing the pathway, and the p-value of the pathway (Fisher's exact test).

| Pathway                                                  | p-value |
|----------------------------------------------------------|---------|
| FXR/RXR activation                                       | 3.2E-06 |
| Purine nucleotides degradation II (aerobic)              | 3.8E-05 |
| Purine ribonucleosides degradation to ribose-1-phosphate | 1.4E-04 |
| Xanthine and xanthosine salvage                          | 4.7E-04 |
| Urate biosynthesis/inosine 5'-phosphate degradation      | 1.1E-03 |
| Leukotriene biosynthesis                                 | 2.1E-03 |
| Adenosine nucleotides degradation II                     | 2.1E-03 |
| Glucose and glucose-1-P degradation                      | 2.8E-03 |
| Maturity onset diabetes of young (MODY) signaling        | 3.6E-03 |
| Glutathione redox reactions II                           | 3.6E-03 |
| Mitochondrial dysfunction                                | 7.9E-03 |
| Antioxidant action of vitamin C                          | 8.7E-03 |
| Glutathione redox reactions I                            | 1.2E-02 |
| Vitamin-C transport                                      | 1.2E-02 |
| Cancer drug resistance by drug efflux                    | 1.2E-02 |
| Ascorbate recycling (cytosolic)                          | 1.5E-02 |
| Galactose degradation I (leloir pathway)                 | 1.9E-02 |
| Sucrose degradation V (mammalian)                        | 2.4E-02 |
| Adenine and adenosine salvage III                        | 2.4E-02 |
| Adipogenesis pathway                                     | 2.5E-02 |
| Protein Kinase A signaling                               | 3.4E-02 |
| Arsenate detoxification I (glutaredoxin)                 | 3.4E-02 |
| Stearate biosynthesis I (animals)                        | 4.6E-02 |
